# Supplementary material
Source: PubMed Central journal article supplement (PMC9677935)
Supplement: PEDS_2021051884SupplementaryData.pdf [file PEDS_2021051884SupplementaryData.pdf]

## Supplemental Information

### SEARCH TERMS

M\*domestic violence/ or \*physical abuse/  
 (((adverse or traumatic) adj3 experience\*) or abuse\* or battered or neglect\* or maltreat\* or mistreat\* or molest\* or (physical\* adj1 punish\*) or violence or assault or torture\* or adverse-trauma\* or early-life-trauma).tw,kf.  
 \*parental death/ or \*maternal death/  
 \*parental death/ or \*maternal death/  
 exp \*Substance-Related Disorders/  
 \*Divorce/  
 exp \*parents/ or \*caregivers/  
 ((parent? or parental or father? or paternal or mother? or maternal or care-giver? or caregiver? or guardian?) adj3 (loss or death\* or dying or incarcerat\* or prison\* or jail\* or divorce\* or separation or

mentally-ill or mental-ill\* or depression or depressive-disorder\* or drug-use or drug-abuse or addict\* or mood-disorder\* or bipolar-disorder\* or dysthymic-disorder\*).tw,kf.  
 exp \*child abuse/ or \*"Child of Impaired Parents"/ or \*adverse childhood experiences/  
 \*Mass Screening/  
 \*Motivational Interviewing/  
 \*"Surveys and Questionnaires"/  
 \*Psychometrics/  
 (Kempes-Family-Stress-Checklist or ACE-study-questio?naire or CYW-ACE-questio?naire or WHO-ACE-international-questio?naire or Childhood-trauma-screening-questio?naire or trauma-symptom-checklist-for-children or trauma-symptom-checklist-for-young-children or Traumatic-events-screening-inventory).tw,kw.  
 screen\*.tw,kf.  
 \*"referral and consultation"/ or

\*secondary care/ or \*tertiary healthcare/  
 treatment outcome/ or exp treatment failure/ or \*safety/ or \*patient safety/\*Mental Health/exp \*Mental Disorders/et, ep,  
 pc\*suicide/et, ep, pc or \*suicidal ideation/et, ep, pc(depression or depressive-disorder\* or anxiety or suicide or well-being or wellbeing or PTSD or psychosis or mental-health).tw,kf.(newborn\* or newborn\* or baby or babies or neonat\* or neo-nat\* or infan\* or toddler\* or pre-schooler\* or preschooler\* or kinder or kinders or kindergarten\* or kinder-aged or boy or boys or girl or girls or child or children or pediatric\* or paediatric\* or school-age\* or schoolage\* or school-child\* or schoolchild\* or school-girl\* or schoolgirl\* or school-boy\* or schoolboy\*).af.
